# Supplementary material for: Identification of Lactic Acid Bacteria in Fruit Pulp Processing Byproducts and Potential Probiotic Properties of Selected Lactobacillus Strains
Source: PubMed Central journal article supplement (PMC5003889; doi:10.3389/fmicb.2016.01371), 2016-08-30
Supplement: Table1.pdf [file Table1.pdf]

**Table S1.** Identification of lactic acid bacteria from fruit pulp processing byproducts (source, identification technique and congruency between applied techniques of identification).

| Byproduct source | Strain code | Identification technique  |                     | Congruency |
|------------------|-------------|---------------------------|---------------------|------------|
|                  |             | MALDI-TOF                 | 16S-rRNA            |            |
| Pineapple        | 40          | <i>L. fermentum</i>       | <i>L. fermentum</i> | yes        |
|                  | 52          | <i>L. fermentum</i>       | <i>L. fermentum</i> | yes        |
|                  | 56          | <i>L. fermentum</i>       | <i>L. fermentum</i> | yes        |
|                  | 220         | <i>L. fermentum</i>       | <i>L. fermentum</i> | yes        |
|                  | 250         | <i>L. fermentum</i>       | <i>L. fermentum</i> | yes        |
|                  | 255         | <i>Lactobacillus</i> spp. | <i>L. fermentum</i> | yes        |
|                  | 256         | <i>Lactobacillus</i> spp. | <i>L. fermentum</i> | yes        |
|                  | 263         | <i>L. fermentum</i>       | <i>L. fermentum</i> | yes        |
|                  | 273         | <i>L. nagelii</i>         | <i>L. fermentum</i> | no         |
|                  | 278         | <i>L. lactis</i>          | <i>L. lactis</i>    | yes        |
| Barbados cherry  | 48          | <i>L. lactis</i>          | <i>L. lactis</i>    | yes        |
|                  | 49          | <i>L. plantarum</i>       | <i>L. plantarum</i> | yes        |
|                  | 50          | <i>L. lactis</i>          | <i>L. lactis</i>    | yes        |
|                  | 53          | <i>L. plantarum</i>       | <i>L. plantarum</i> | yes        |
|                  | 54          | <i>L. brevis</i>          | <i>L. brevis</i>    | yes        |
|                  | 55          | <i>L. fermentum</i>       | <i>L. fermentum</i> | yes        |
|                  | 59          | <i>L. brevis</i>          | <i>L. brevis</i>    | yes        |
|                  | 60          | <i>L. fermentum</i>       | <i>L. fermentum</i> | yes        |
|                  | 61          | <i>L. nagelii</i>         | <i>L. nagelii</i>   | yes        |
|                  | 138         | <i>L. plantarum</i>       | <i>L. plantarum</i> | yes        |
| Soursop          | 104         | <i>Lactobacillus</i> spp. | <i>L. fermentum</i> | yes        |
|                  | 106         | <i>L. paracasei</i>       | <i>L. casei</i>     | no         |

|            |     |                           |                         |     |
|------------|-----|---------------------------|-------------------------|-----|
|            | 107 | <i>Lactobacillus</i> spp. | <i>L. fermentum</i>     | yes |
|            | 108 | <i>L. paracasei</i>       | <i>L. paracasei</i>     | yes |
|            | 110 | <i>L. nagelii</i>         | <i>L. nagelii</i>       | yes |
|            | 111 | <i>L. fermentum</i>       | <i>L. fermentum</i>     | yes |
|            | 114 | <i>L. nagelii</i>         | <i>L. nagelli</i>       | yes |
|            | 115 | <i>L. nagelii</i>         | <i>L. nagelli</i>       | yes |
|            | 141 | <i>L. fermentum</i>       | <i>L. fermentum</i>     | yes |
|            | 214 | <i>L. nagelii</i>         | <i>L. nagelii</i>       | yes |
| Mango      | 128 | <i>L. plantarum</i>       | <i>L. plantarum</i>     | yes |
|            | 129 | <i>L. pentosus</i>        | <i>L. pentosus</i>      | yes |
|            | 133 | <i>L. mesenteroides</i>   | <i>L. mesenteroides</i> | yes |
|            | 136 | <i>P. pentosaceus</i>     | <i>P. pentosaceus</i>   | yes |
|            | 139 | <i>L. fermentum</i>       | <i>L. fermentum</i>     | yes |
|            | 149 | <i>L. mesenteroides</i>   | <i>L. mesenteroides</i> | yes |
|            | 198 | <i>L. plantarum</i>       | <i>L. plantarum</i>     | yes |
|            | 199 | <i>L. nagelii</i>         | <i>L. nagelli</i>       | yes |
|            | 201 | <i>L. plantarum</i>       | <i>L. plantarum</i>     | yes |
|            | 205 | <i>L. mesenteroides</i>   | <i>L. mesenteroides</i> | yes |
| Strawberry | 63  | <i>L. fermentum</i>       | <i>L. fermentum</i>     | yes |
|            | 140 | <i>Lactobacillus</i> spp. | <i>L. fermentum</i>     | yes |
|            | 219 | <i>L. fermentum</i>       | <i>L. fermentum</i>     | yes |
|            | 281 | <i>L. fermentum</i>       | <i>L. fermentum</i>     | yes |
|            | 202 | <i>Lactobacillus</i> spp. | <i>L. fermentum</i>     | yes |
|            | 222 | <i>L. fermentum</i>       | <i>L. fermentum</i>     | yes |
|            | 284 | <i>L. fermentum</i>       | <i>L. fermentum</i>     | yes |
|            | 291 | <i>Lactobacillus</i> spp. | <i>L. fermentum</i>     | yes |
|            | 296 | <i>L. fermentum</i>       | <i>L. fermentum</i>     | yes |
